# Supplementary material for: The Prevalence of Asymptomatic Cervical Spinal Cord Compression in Individuals Presenting With Symptomatic Lumbar Spinal Stenosis: A Meta-Analysis
Source: PubMed Central journal article supplement — Global Spine J. 2023 Sep 20;14(3):1052–60. doi: 10.1177/21925682231202776 (PMC11192137; doi:10.1177/21925682231202776), 2023-09-20
Supplement: sj-pdf-1-gsj-10.1177_21925682231202776.pdf [file sj-pdf-1-gsj-10.1177_21925682231202776.pdf]

| Database | Search string                                                                                                                                                                                                                                                                                                                                                                                                                                                                                                                                                                                                                                                                                                                                                                                                                                                                                                                                                                                                                                                                                                                                                                                                                                                                                                                                                                                                                                         | Results |
|----------|-------------------------------------------------------------------------------------------------------------------------------------------------------------------------------------------------------------------------------------------------------------------------------------------------------------------------------------------------------------------------------------------------------------------------------------------------------------------------------------------------------------------------------------------------------------------------------------------------------------------------------------------------------------------------------------------------------------------------------------------------------------------------------------------------------------------------------------------------------------------------------------------------------------------------------------------------------------------------------------------------------------------------------------------------------------------------------------------------------------------------------------------------------------------------------------------------------------------------------------------------------------------------------------------------------------------------------------------------------------------------------------------------------------------------------------------------------|---------|
| PubMed   | <p>#1 ("cervical cord"[MeSH Terms] OR ("Cervical Cords"[Title/Abstract] OR "Cervical Spinal Cord"[Title/Abstract] OR "Cervical Spinal Cords"[Title/Abstract] OR "Intervertebral Disc Displacement"[Title/Abstract] OR "Ossification of Posterior Longitudinal Ligament"[Title/Abstract] OR "Spondylosis"[Title/Abstract] OR "Spinal Cord Myelopathy"[Title/Abstract] OR "Tandem spinal stenosis"[Title/Abstract] OR "spinal cord compression"[Title/Abstract]) OR ("cord*" [Title/Abstract] AND "cervical*" [Title/Abstract]) OR ("cord*" [Title/Abstract] AND "Cervical Spinal"[Title/Abstract]) OR ("Spinal Cord"[Title/Abstract] AND "cervical*" [Title/Abstract]) OR ("Spinal Cords"[Title/Abstract] AND "cervical*" [Title/Abstract]))</p> <p>#2 ("spinal stenosis"[MeSH Terms] OR ("Lumbar Spinal Stenosis"[Title/Abstract] OR "Spinal Stenoses"[Title/Abstract] OR "Lumbosacral Regions"[Title/Abstract] OR "Lumbar Vertebrae"[Title/Abstract] OR "Lumbar Region"[Title/Abstract] OR "Lumbar Regions"[Title/Abstract]) OR (("region*" [Title/Abstract] AND "Lumbosacral"[Title/Abstract]) OR ("Regions"[Title/Abstract] AND "Lumbosacral"[Title/Abstract]) OR ("Stenoses"[Title/Abstract] AND "spinal*" [Title/Abstract]) OR ("Stenosis"[Title/Abstract] AND "spinal*" [Title/Abstract]) OR ("region*" [Title/Abstract] AND "lumbar*" [Title/Abstract]) OR ("Regions"[Title/Abstract] AND "lumbar*" [Title/Abstract]))</p> <p>#3 #1 AND #2</p> | 1475    |
| Scopus   | <p>#1 TITLE-ABS("Lumbar Spinal Stenosis " OR "Spinal Stenoses" OR "Lumbosacral Regions" OR "Lumbar Vertebrae" OR "Lumbar Region" OR "Lumbar Regions") OR TITLE-ABS( (Region* AND Lumbosacral) OR (Regions AND Lumbosacral) OR (Stenoses AND Spinal) OR (Stenosis AND Spinal) OR (Region* AND Lumbar*) OR (Regions AND Lumbar*) )</p> <p>#2 TITLE-ABS ( "Cervical Cords" OR "Cervical Spinal Cord" OR "Cervical Spinal Cords" OR "Intervertebral Disc Displacement" OR "Ossification of Posterior Longitudinal Ligament" OR "Spondylosis" OR "Spinal Cord Myelopathy" OR "Tandem spinal stenosis" OR "spinal cord compression" ) OR TITLE-ABS ( ( cord* AND cervical* ) OR ( cord* AND "Cervical Spinal" ) OR ( "Spinal Cord" AND cervical* ) OR ( "Spinal</p>                                                                                                                                                                                                                                                                                                                                                                                                                                                                                                                                                                                                                                                                                         | 2798    |

|                       |                                                                                                                                                                                                                                                                                                                                                                                                                                                                                                                                                                                                                                                                                                                                                                                                                                                                                                                                                                                                                                                                                                                                                                                                                                                                                                                                                                                                                                                                                                                                                                                                                                                  |             |
|-----------------------|--------------------------------------------------------------------------------------------------------------------------------------------------------------------------------------------------------------------------------------------------------------------------------------------------------------------------------------------------------------------------------------------------------------------------------------------------------------------------------------------------------------------------------------------------------------------------------------------------------------------------------------------------------------------------------------------------------------------------------------------------------------------------------------------------------------------------------------------------------------------------------------------------------------------------------------------------------------------------------------------------------------------------------------------------------------------------------------------------------------------------------------------------------------------------------------------------------------------------------------------------------------------------------------------------------------------------------------------------------------------------------------------------------------------------------------------------------------------------------------------------------------------------------------------------------------------------------------------------------------------------------------------------|-------------|
|                       | <p style="text-align: center;"><b>Cords" AND cervical* ) )</b></p> <p style="text-align: center;"><b>#3 #1 AND #2</b></p>                                                                                                                                                                                                                                                                                                                                                                                                                                                                                                                                                                                                                                                                                                                                                                                                                                                                                                                                                                                                                                                                                                                                                                                                                                                                                                                                                                                                                                                                                                                        |             |
| <b>Web of Science</b> | <p style="text-align: center;"><b>#1</b></p> <p><b>TS=(“Cervical Cords” OR “Cervical Spinal Cord” OR “Cervical Spinal Cords” OR “Intervertebral Disc Displacement” OR “Ossification of Posterior Longitudinal Ligament” OR “Spondylosis” OR “Spinal Cord Myelopathy” OR “Tandem spinal stenosis” OR “spinal cord compression” ) OR TI=(“Cervical Cords” OR “Cervical Spinal Cord” OR “Cervical Spinal Cords” OR “Intervertebral Disc Displacement” OR “Ossification of Posterior Longitudinal Ligament” OR “Spondylosis” OR “Spinal Cord Myelopathy” OR “Tandem spinal stenosis” OR “spinal cord compression” ) OR TI=((Cord* AND Cervical*) OR (Cord* AND “Cervical Spinal”) OR (“Spinal Cord” AND Cervical*) OR (“Spinal Cords” AND Cervical*) ) OR TS=((Cord* AND Cervical*) OR (Cord* AND “Cervical Spinal”) OR (“Spinal Cord” AND Cervical*) OR (“Spinal Cords” AND Cervical*) )</b></p> <p style="text-align: center;"><b>#2</b></p> <p><b>TI=(“Lumbar Spinal Stenosis“ OR “Spinal Stenoses” OR “Lumbosacral Regions” OR “Lumbar Vertebrae” OR “Lumbar Region” OR “Lumbar Regions”)) OR TS=(“Lumbar Spinal Stenosis“ OR “Spinal Stenoses” OR “Lumbosacral Regions” OR “Lumbar Vertebrae” OR “Lumbar Region” OR “Lumbar Regions”)) OR TI=( (Region* AND Lumbosacral) OR (Regions AND Lumbosacral) OR (Stenoses AND Spinal) OR (Stenosis AND Spinal) OR (Region* AND Lumbar*) OR (Regions AND Lumbar*) ) OR TS=( (Region* AND Lumbosacral) OR (Regions AND Lumbosacral) OR (Stenoses AND Spinal) OR (Stenosis AND Spinal) OR (Region* AND Lumbar*) OR (Regions AND Lumbar*) )</b></p> <p style="text-align: center;"><b>#3 #1 AND #2</b></p> | <b>2633</b> |
| <b>Embase</b>         | <p style="text-align: center;"><b>#6 #3 OR #4</b></p> <p style="text-align: center;"><b>#5 #1 OR #2</b></p> <p style="text-align: center;"><b>#4 region*:ab,ti AND lumbosacral:ab,ti OR (regions:ab,ti AND</b></p>                                                                                                                                                                                                                                                                                                                                                                                                                                                                                                                                                                                                                                                                                                                                                                                                                                                                                                                                                                                                                                                                                                                                                                                                                                                                                                                                                                                                                               | <b>3366</b> |

**lumbosacral:ab,ti) OR (stenoses:ab,ti AND spinal:ab,ti) OR (stenosis:ab,ti AND spinal:ab,ti) OR (region\*:ab,ti AND lumbar\*:ab,ti) OR (regions:ab,ti AND lumbar\*:ab,ti)**

**#3 'lumbar spinal stenosis':ab,ti OR 'spinal stenoses':ab,ti OR 'lumbosacral regions':ab,ti OR 'lumbar vertebrae':ab,ti OR 'lumbar region':ab,ti OR 'lumbar regions':ab,ti**

**#2 cord\*:ab,ti AND cervical\*:ab,ti OR (cord\*:ab,ti AND 'cervical spinal':ab,ti) OR ('spinal cord':ab,ti AND cervical\*:ab,ti) OR ('spinal cords':ab,ti AND cervical\*:ab,ti)**

**#1 'cervical cords':ab,ti OR 'cervical spinal cord':ab,ti OR 'cervical spinal cords':ab,ti OR 'intervertebral disc displacement':ab,ti OR 'ossification of posterior longitudinal ligament':ab,ti OR 'spondylosis':ab,ti OR 'spinal cord myelopathy':ab,ti OR 'tandem spinal stenosis':ab,ti OR 'spinal cord compression':ab,ti**
